# Supplementary material for: The Staphylococcus aureus superantigen SElX is a bifunctional toxin that inhibits neutrophil function
Source: PubMed Central journal article supplement (PMC5589267; doi:10.1371/journal.ppat.1006461), 2017-09-07

Figure S1

(i)

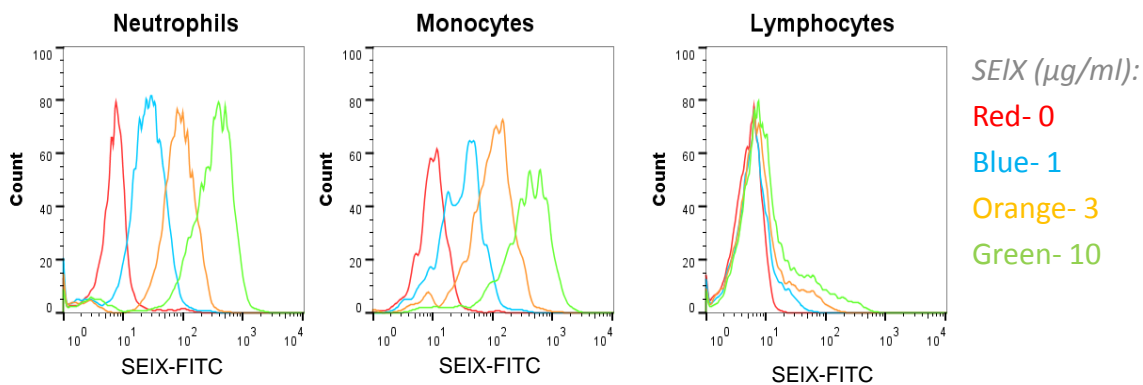

(ii)

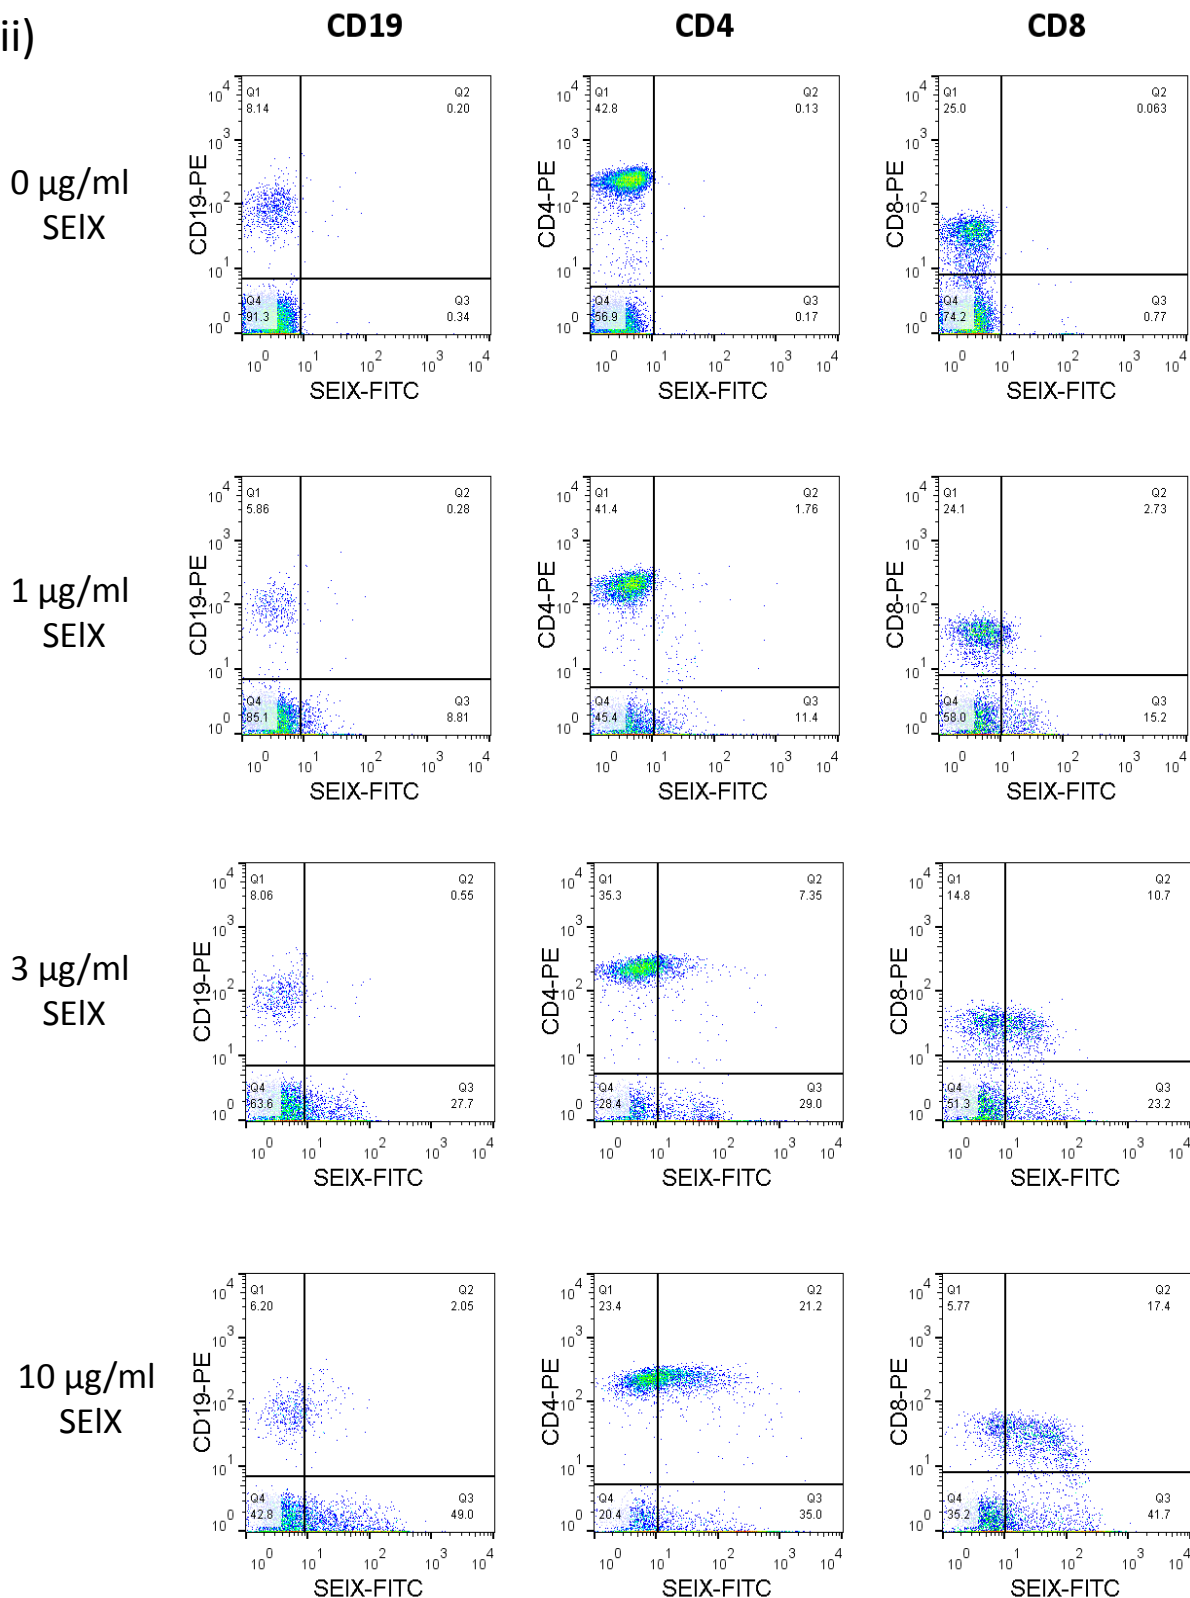

Supplement: ppat.1006461.s001.pdf [file ppat.1006461.s001.pdf]
