# Supplementary material for: The Staphylococcus aureus superantigen SElX is a bifunctional toxin that inhibits neutrophil function
Source: PubMed Central journal article supplement (PMC5589267; doi:10.1371/journal.ppat.1006461), 2017-09-07
Supplement: ppat.1006461.s002.pdf [file ppat.1006461.s002.pdf]

Figure S2

(i)

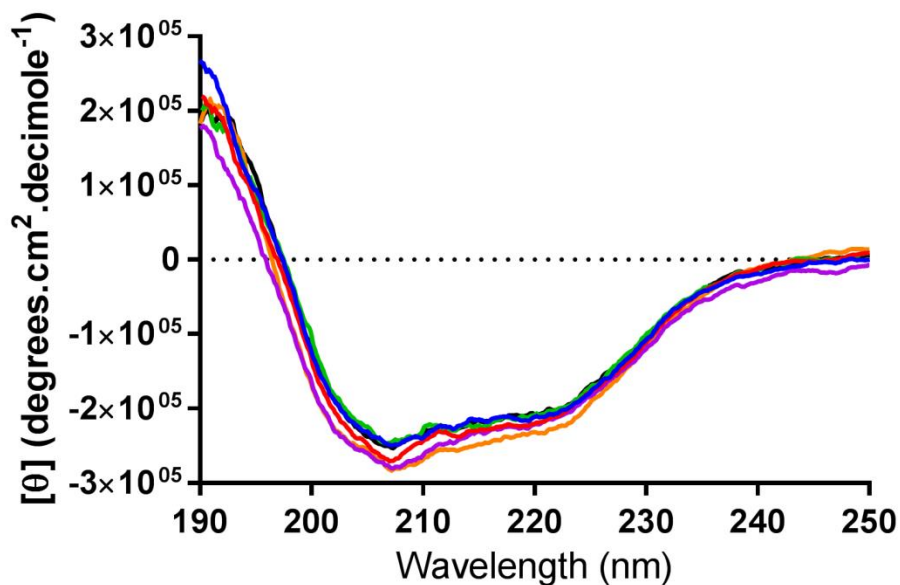

(ii)

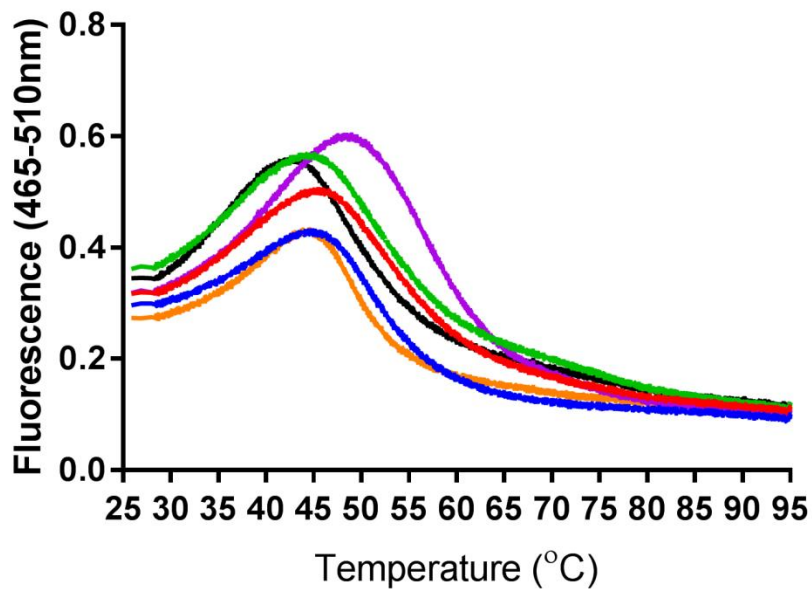

- SEIX WT
- SEIX E154A
- SEIX K156A
- SEIX Q159A
- SEIX D161A
- SEIX EKQD-A

| SEIX mutant | $T_m$ ( $^{\circ}$ C) |
|-------------|-----------------------|
| WT          | 44.88                 |
| E154A       | 45.62                 |
| K156A       | 43.70                 |
| Q159A       | 48.80                 |
| D161A       | 43.89                 |
| EKQD-A      | 42.63                 |
