# Supplementary material for: The Staphylococcus aureus superantigen SElX is a bifunctional toxin that inhibits neutrophil function
Source: PubMed Central journal article supplement (PMC5589267; doi:10.1371/journal.ppat.1006461), 2017-09-07

**Figure S3**

**(i)**

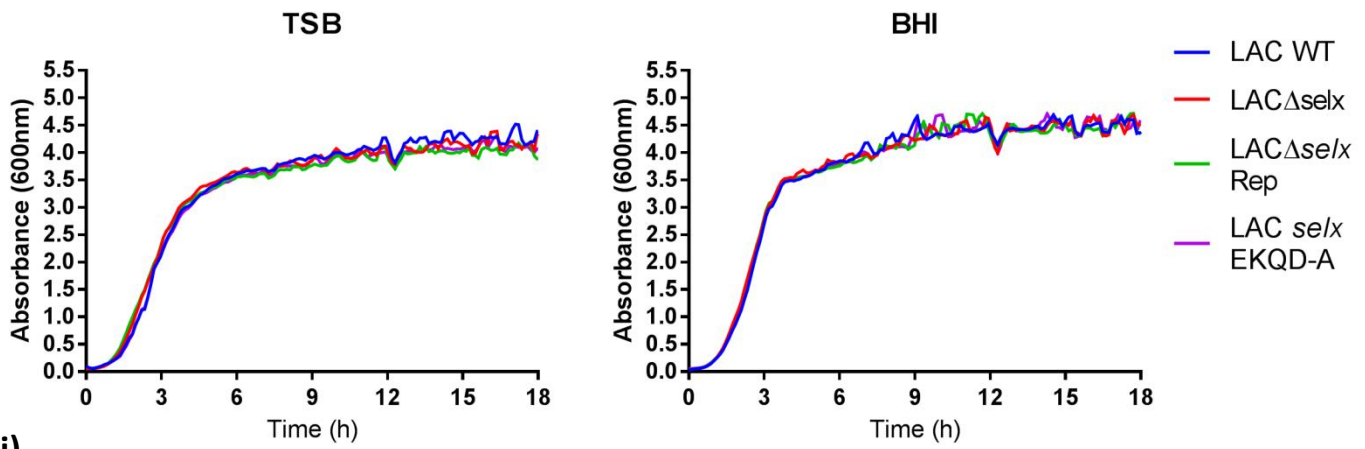

**(ii)**

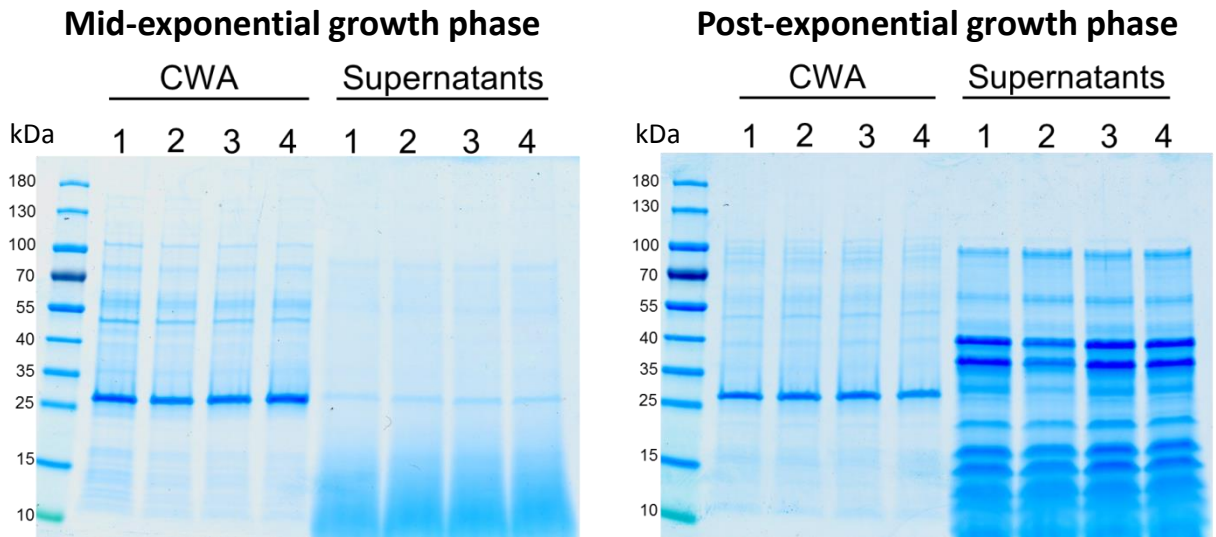

**(iii)**

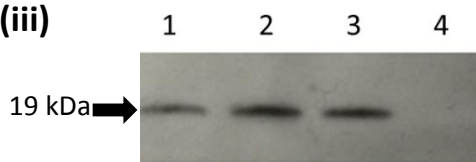

**(iv)**

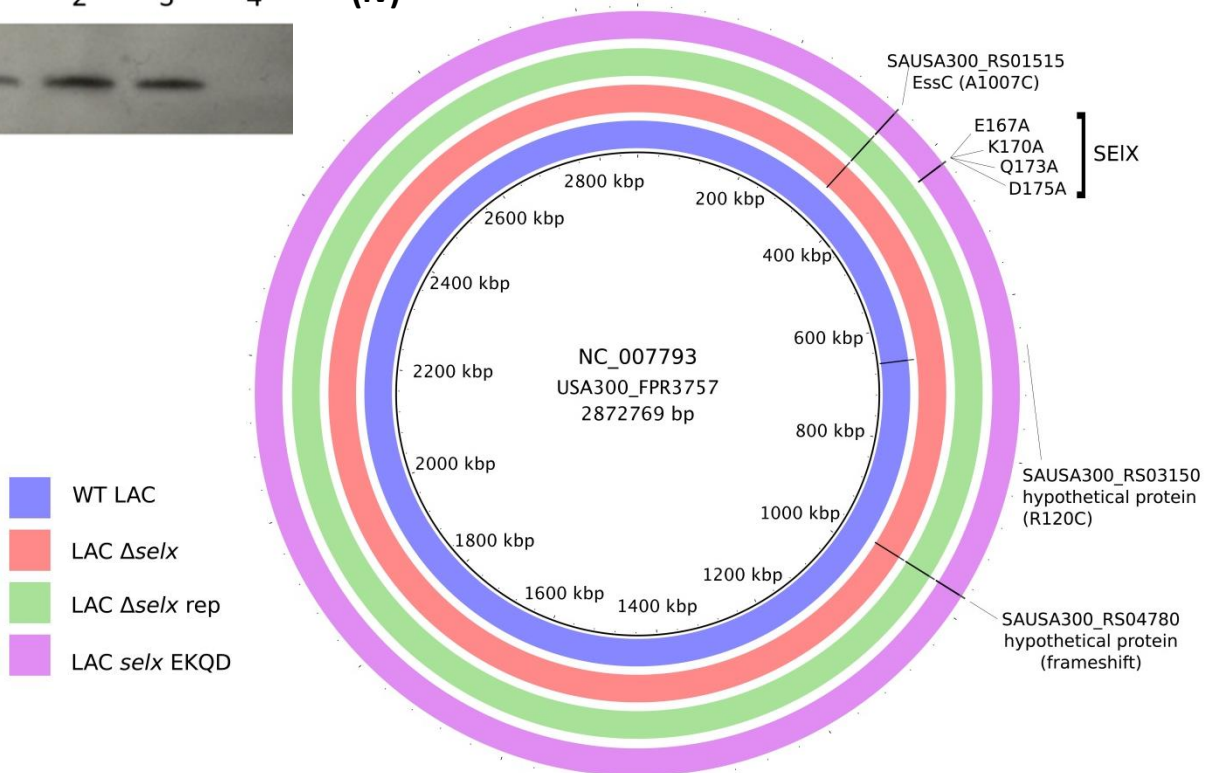

Supplement: ppat.1006461.s003.pdf [file ppat.1006461.s003.pdf]
