# Supplementary material for: The Staphylococcus aureus superantigen SElX is a bifunctional toxin that inhibits neutrophil function
Source: PubMed Central journal article supplement (PMC5589267; doi:10.1371/journal.ppat.1006461), 2017-09-07
Supplement: ppat.1006461.s005.pdf [file ppat.1006461.s005.pdf]

**Table S1: Neutrophil protein ligands of SEIX identified by affinity precipitation analysis**

| Protein                      | Size (kDa) | Accession <sup>a</sup> |
|------------------------------|------------|------------------------|
| CD45                         | 130.8      | P08575-2               |
| MGAM (maltase-glucoamylase)  | 311        | E7ER45                 |
| CD31                         | 109.5      | P16284-3               |
| CD13                         | 80.2       | P15144                 |
| CD148                        | 145.9      | Q12913                 |
| CR1 (CD35)                   | 200        | P17927                 |
| CD16b                        | 38         | O75015                 |
| p22-PHOX                     | 65.3       | P04839                 |
| CD50 (ICAM-3)                | 59.5       | P32942                 |
| Integrin $\alpha$ -L (CD11a) | 119.1      | P20701-3               |
| P-selectin                   | 50         | P16109                 |
| L-selectin                   | 74         | P16109                 |
| VNN2                         | 60         | O95498                 |
| C1q receptor (CD93)          | 68.6       | Q9NPY3                 |
| ADP-ribosyl cyclase (CD38)   | 34.3       | P28907                 |
| Nicastrin                    | 78.4       | Q92542                 |
| Alkaline phosphatase         | 57.3       | P05186                 |

<sup>a</sup> Uniprot accession numbers
